## Supplementary Materials

### Figures:

Figure S1. Mycobacterial ESX loci.

Figure S2. Network of ESX loci in mycobacteria, *Nocardia*, and mycobacterial plasmids with tip labels.

Figure S3. Maximum likelihood phylogeny of ESX loci in mycobacteria, *Nocardia*, and mycobacterial plasmids.

Figure S4. ESX loci in *Nocardia*.

Figure S5. Phylogeny of ESX-5.

Figure S6. Episodic directional selection during the evolution of ESX loci with tip labels.

Figure S7. Episodic directional selection during the evolution of ESX loci (Gblocks trimmed).

### Tables:

Table S1. Accession numbers for finished genomes

Table S2. Accession numbers for sequence read data used in plasmid assemblies.

Table S3. Accession numbers for finished plasmids.

Table S4. Shared plasmid gene content.

## ESX-1

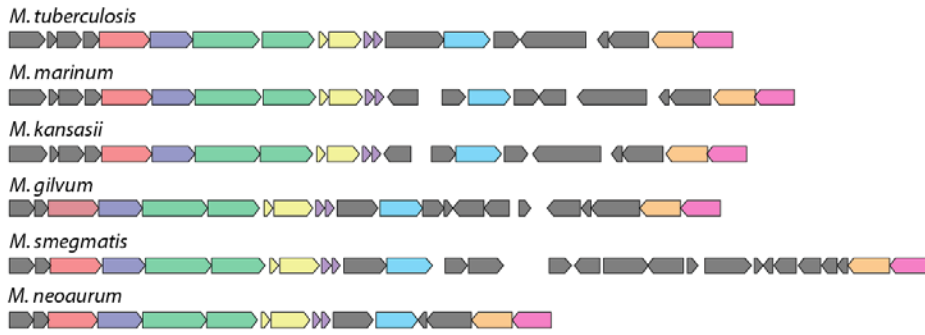

## ESX-2

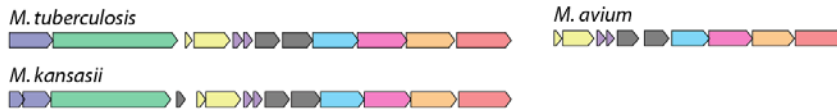

## ESX-3

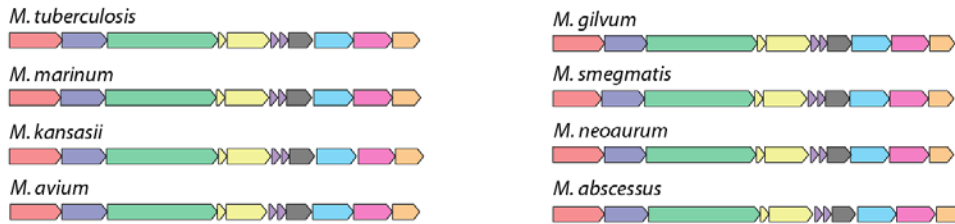

## ESX-4

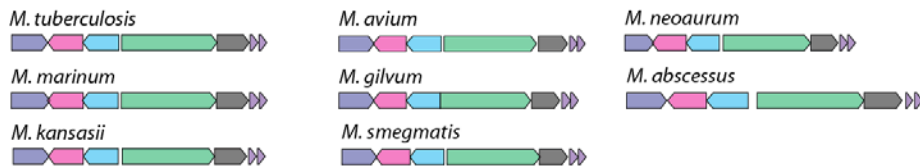

## ESX-5

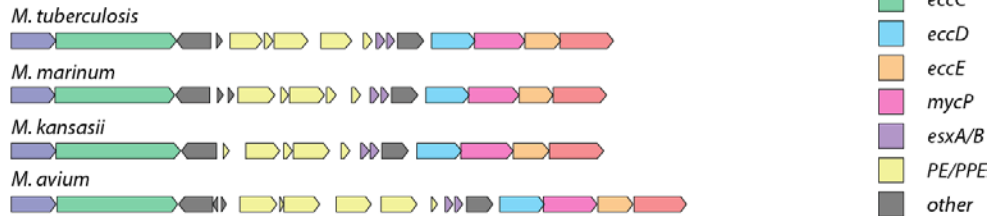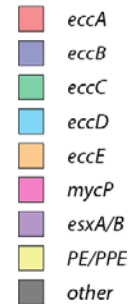

**Figure S1. Mycobacterial ESX loci.** Core gene content in the ESX loci are colored as follows: *eccA*- red, *eccB*- dark blue, *eccC*- green, *eccD*- light blue, *eccE*- orange, *mycP*- pink, *esxA/B*- purple, *PE/PPE*- yellow. Other variable genes in the loci are black. Orthologs and paralogs are based on OrthoMCL (Li et al. 2003) output. Locus diagrams were made using GenomeTools (Gremme et al. 2013).

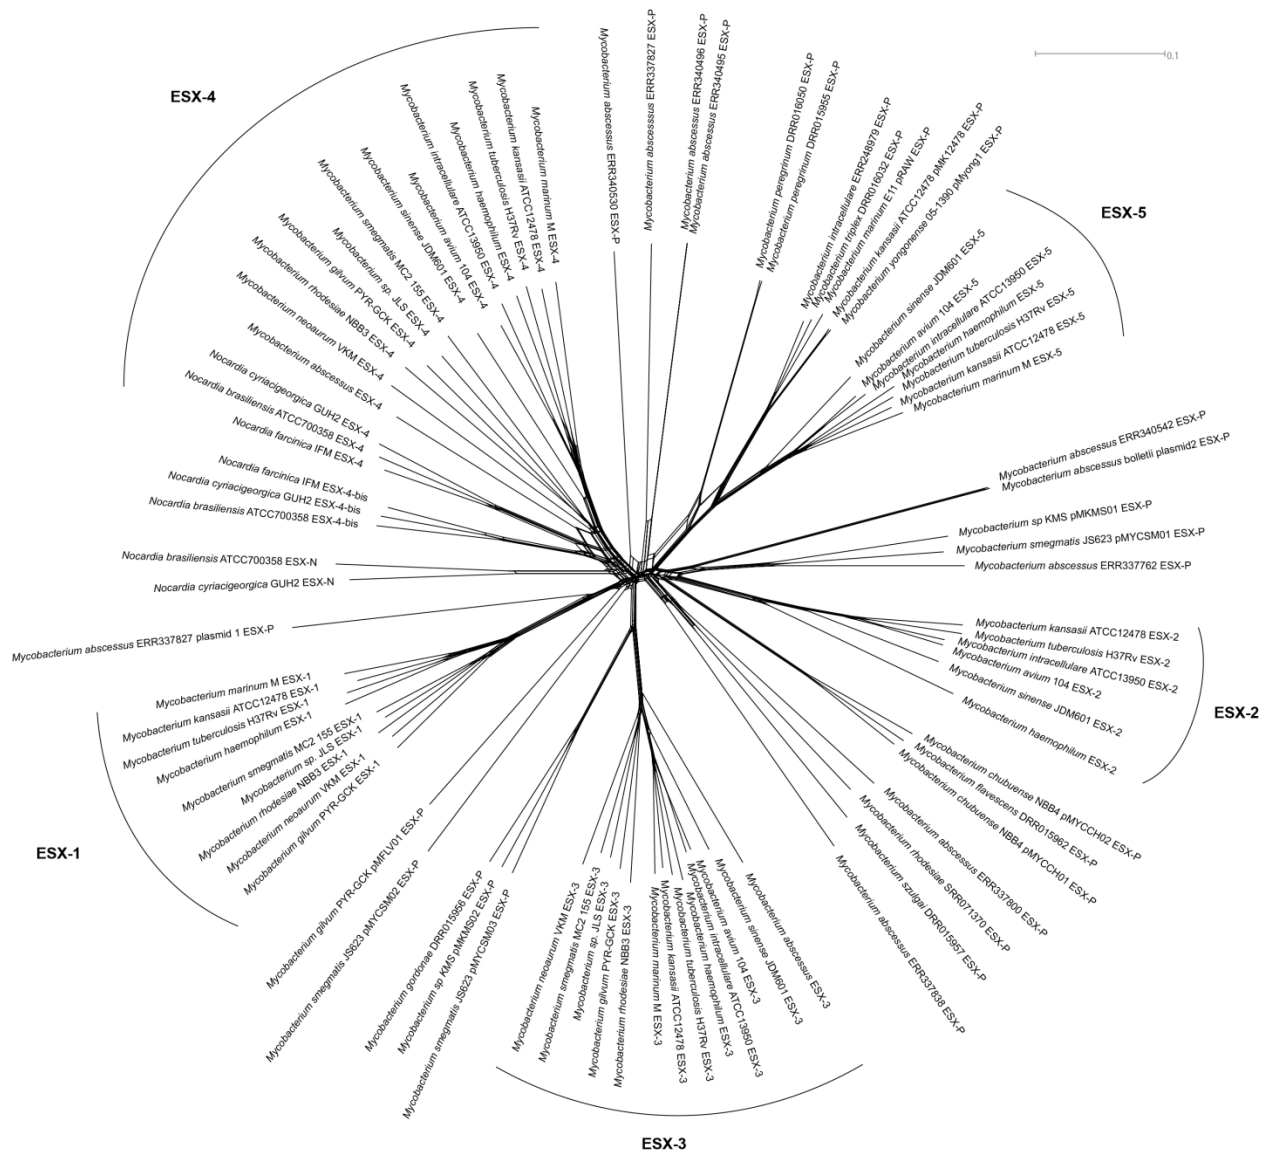

**Figure S2. Network of ESX loci in mycobacteria, *Nocardia*, and mycobacterial plasmids.** The network was created in SplitsTree4 (Huson and Bryant 2006) from a concatenated alignment of *eccA*, *eccB*, *eccC*, *eccD*, *eccE*, and *mycP*. The PHI test (Bruen et al. 2006) was insignificant for this alignment.

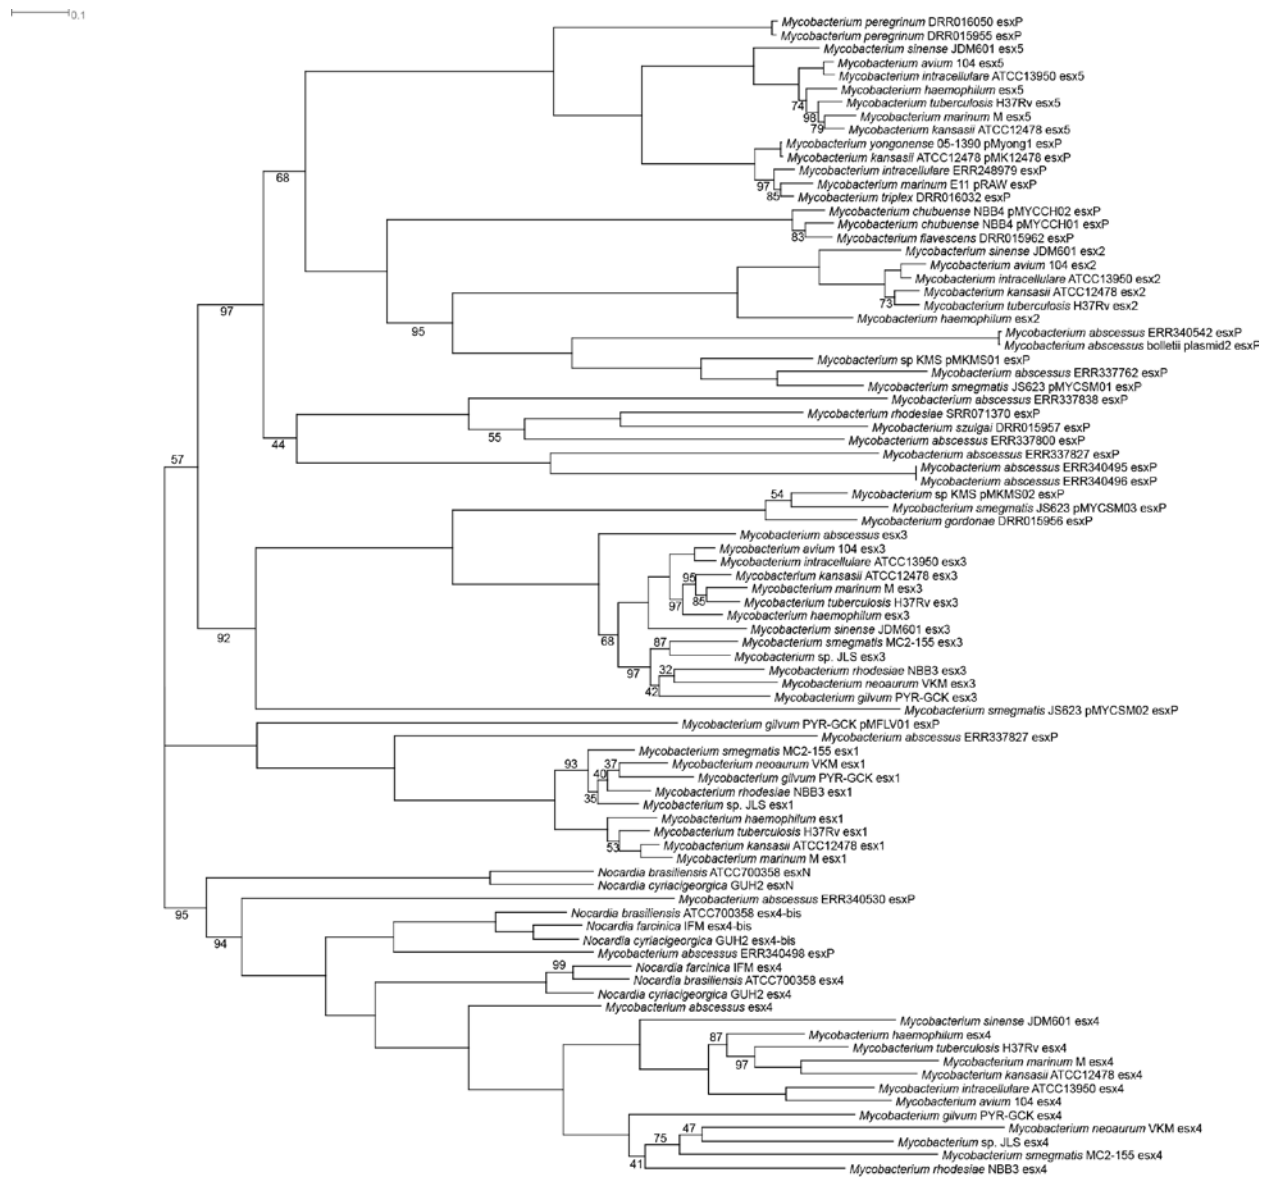

**Figure S3. Maximum likelihood phylogeny of ESX loci in mycobacteria, *Nocardia*, and mycobacterial plasmids.** The maximum likelihood phylogeny was created with RAxML (Stamatakis 2014) from a concatenated alignment of *eccA*, *eccB*, *eccC*, *eccD*, *eccE*, and *mycP* with poorly aligned columns removed with GUIDANCE (Sela et al. 2015). Branches without labels have a bootstrap value of 100.

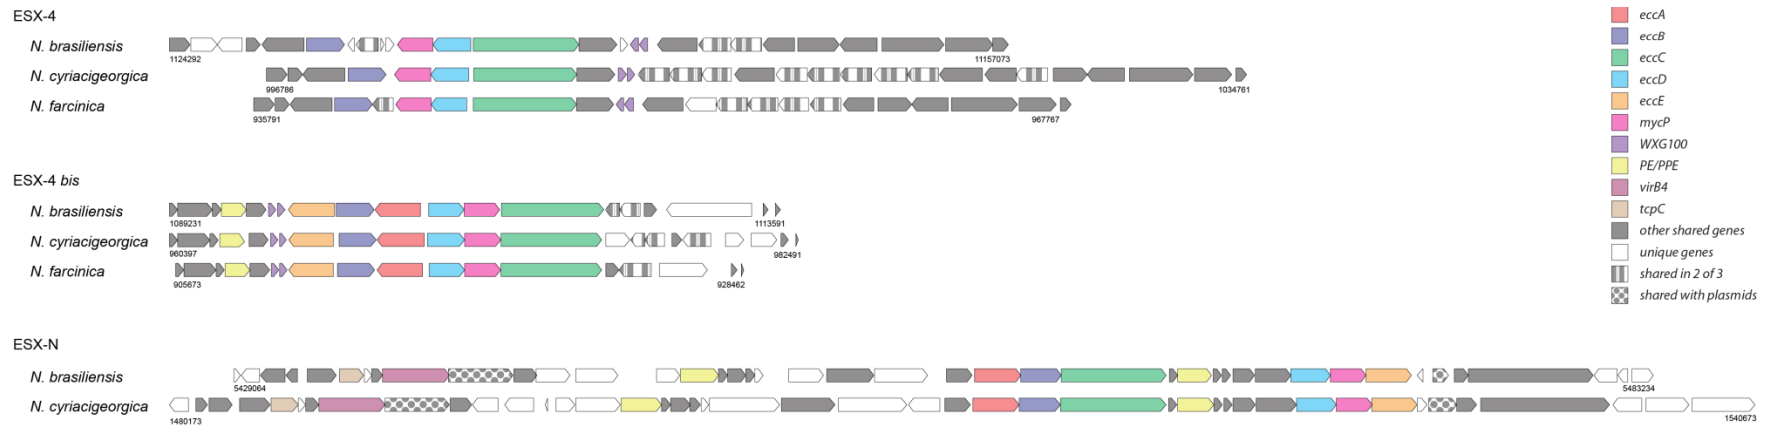

**Figure S4. ESX loci in *Nocardia*.** ESX genes are colored as follows: *eccA*- red, *eccB*- dark blue, *eccC*- green, *eccD*- light blue, *eccE*- orange, *mycP*- pink, *WXG100*- dark purple, *PE/PPE*- yellow. Type IV secretion system genes are colored as follows: *virB4*- light purple, *tcpC*- tan. Flanking genes shared between all strains are black, genes unique to the locus are white, genes found in two of three *Nocardia* species are striped, and genes found only in ESX-N and mycobacteria plasmids are dotted. Orthologs and paralogs are based on OrthoMCL (Li et al. 2003) output. Locus diagrams were made using GenomeTools (Gremme et al. 2013).

—|0.01

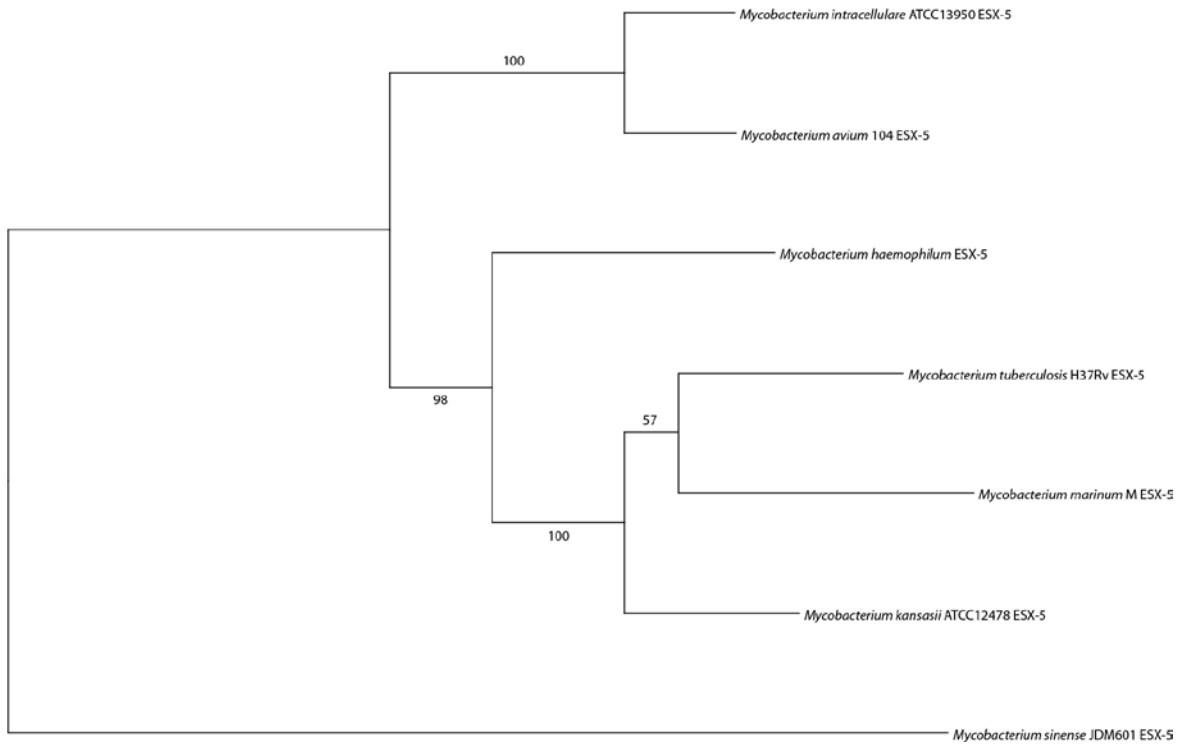

**Figure S5. Phylogeny of ESX-5.** The maximum likelihood phylogeny was created with RAXML (Stamatakis 2014) from a concatenated alignment of *eccA*, *eccB*, *eccC*, *eccD*, *eccE*, *mycP*, *cyp143*, and *Rv1794* with poorly aligned columns removed with GUIDANCE (Sela et al. 2015).

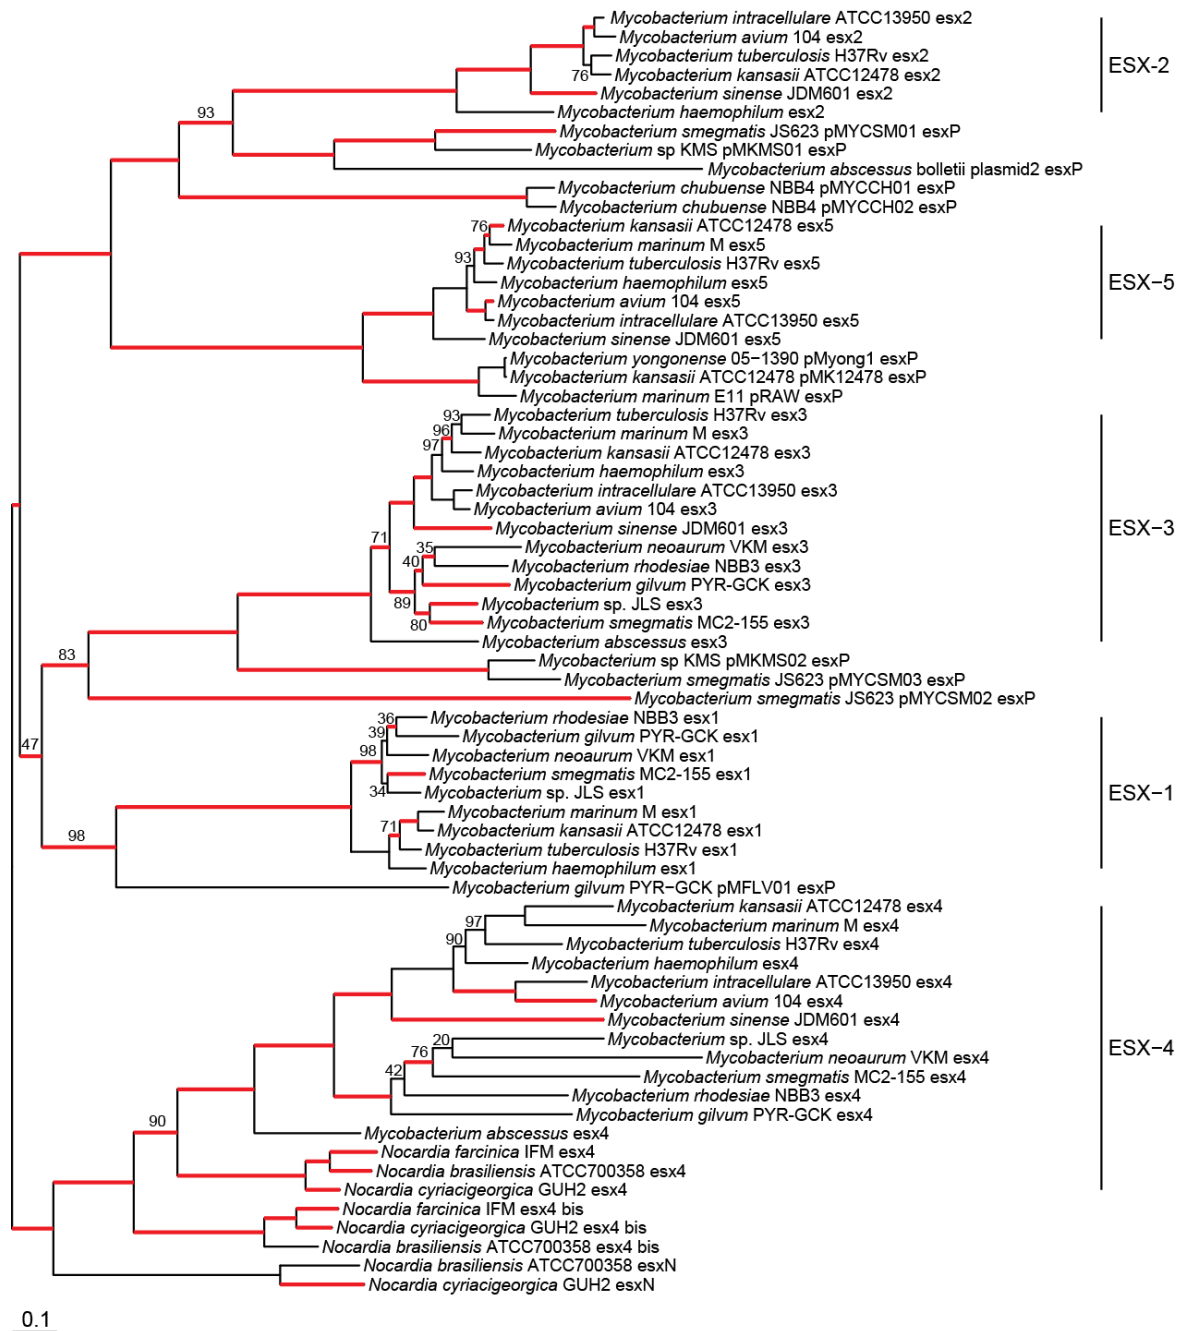

**Figure S6. Episodic directional selection during the evolution of ESX loci.** The maximum likelihood phylogeny was created with RAXML (Stamatakis 2014) from a concatenated alignment of *eccA*, *eccB*, *eccC*, *eccD*, *eccE*, and *mycP* with poorly aligned columns removed with GUIDANCE (Sela et al. 2015). Branches without labels have a bootstrap value of 100. We used the aBSREL test implemented in HyPhy (Smith et al. 2015) to identify branches with significant evidence of episodic directional selection. These branches are highlighted in red.

0.1

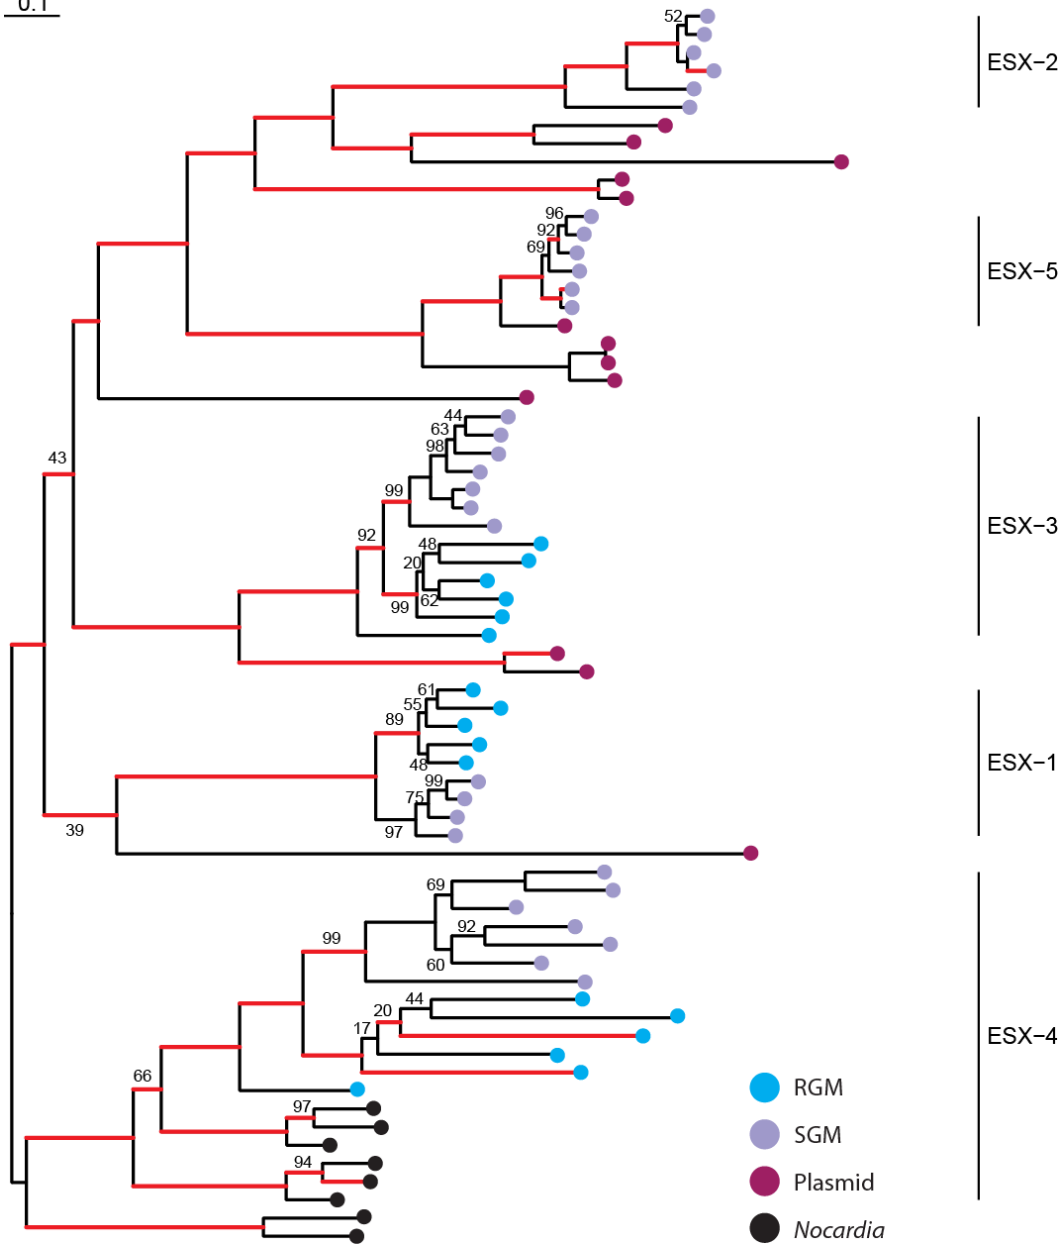

**Figure S7. Episodic directional selection during the evolution of ESX loci (Gblocks trimmed).** Light blue dots correspond to ESX loci from rapid growing mycobacterial chromosomes, light purple dots correspond to ESX loci from slow growing mycobacterial chromosomes, magenta dots correspond to ESX loci from mycobacterial plasmids, and black dots correspond to ESX loci from *Nocardia* chromosomes. All chromosomal ESX duplications (ESX-1-5) have basal plasmid loci, suggesting that the ancestral ESX locus was likely plasmid borne. The maximum likelihood phylogeny was created with RAxML (Stamatakis 2014) from a concatenated alignment of *eccA*, *eccB*, *eccC*, *eccD*, *eccE*, and *mycP* trimmed with Gblocks (Castresana 2000). Branches without labels have a bootstrap value of 100. We used the aBSREL test implemented in HyPhy (Smith et al. 2015) to identify branches with significant evidence of episodic directional selection. These branches are highlighted in red.



**Table S1. Accession numbers for finished genomes.**

| Strain name                                      | Accession     |
|--------------------------------------------------|---------------|
| <i>Acidothermus cellulolyticus</i> 11B           | NC_008578.1   |
| <i>Corynebacterium diphtheriae</i> NCTC13129     | NC_008578.2   |
| <i>Corynebacterium efficiens</i> YS314           | NC_004369.1   |
| <i>Corynebacterium glutamicum</i> ATCC13032      | NC_003450.3   |
| <i>Corynebacterium jeikeium</i> K411             | NC_007164.1   |
| <i>Corynebacterium pseudotuberculosis</i> 106A   | NC_017308.1   |
| <i>Mycobacterium abscessus</i>                   | NC_010397.1   |
| <i>Mycobacterium africanum</i> GM041182          | NC_015758.1   |
| <i>Mycobacterium avium</i> 104                   | NC_008595.1   |
| <i>Mycobacterium avium paratuberculosis</i> MAP4 | NC_021200.1   |
| <i>Mycobacterium bovis</i> AF212297              | NC_002945.3   |
| <i>Mycobacterium canettii</i> CIPT 140010059     | NC_015848.1   |
| <i>Mycobacterium chelonae</i>                    | NZ_CP010946.1 |
| <i>Mycobacterium chubuense</i> NBB4              | NC_018027.1   |
| <i>Mycobacterium gilvum</i> PYRGCK               | NC_009338.1   |
| <i>Mycobacterium goodii</i> X7B                  | NZ_CP012150.1 |
| <i>Mycobacterium haemophilum</i> DSM 44634       | NZ_CP011883.2 |
| <i>Mycobacterium indicus pranii</i> MTCC 9506    | NC_018612.1   |
| <i>Mycobacterium intracellulare</i> ATCC13950    | NC_016946.1   |
| <i>Mycobacterium</i> JDM601                      | NC_015576.1   |
| <i>Mycobacterium</i> JLS                         | NC_009077.1   |
| <i>Mycobacterium kansasii</i> ATCC12478          | NC_022663.1   |
| <i>Mycobacterium</i> KMS                         | NC_008705.1   |
| <i>Mycobacterium leprae</i> Br4923               | NC_011896.1   |
| <i>Mycobacterium liflandii</i> 128FXT            | NC_020133.1   |
| <i>Mycobacterium marinum</i> M                   | NC_010612.1   |
| <i>Mycobacterium</i> MCS                         | NC_008146.1   |
| <i>Mycobacterium</i> MOTT36Y                     | NC_017904.1   |
| <i>Mycobacterium neoaurum</i> VKM Ac1815D        | NC_023036.2   |
| <i>Mycobacterium rhodesiae</i> NBB3              | NC_016604.1   |
| <i>Mycobacterium smegmatis</i> JS623             | NC_019966.1   |
| <i>Mycobacterium smegmatis</i> MC2 155           | NC_018289.1   |
| <i>Mycobacterium tuberculosis</i> H37Rv          | NC_000962.3   |
| <i>Mycobacterium ulcerans</i> Agy99              | NC_008611.1   |
| <i>Mycobacterium vanbaalenii</i> PYR1            | NC_008726.1   |
| <i>Mycobacterium yongonense</i> 051390           | NC_021715.1   |
| <i>Nocardia brasiliensis</i> ATCC700358          | NC_018681.1   |
| <i>Nocardia cyriacigeorgica</i> GUH2             | NC_016887.1   |
| <i>Nocardia farcinica</i> IFM10152               | NC_006361.1   |
| <i>Rhodococcus equi</i> 103S                     | NC_014659.1   |
| <i>Rhodococcus erythropolis</i> PR4              | NC_012490.1   |

|                                            |             |
|--------------------------------------------|-------------|
| <i>Rhodococcus jostii</i> RHA1             | NC_008268.1 |
| <i>Rhodococcus opacus</i> B4               | NC_012522.1 |
| <i>Rhodococcus pyridinivorans</i> SB3094   | NC_023150.1 |
| <i>Streptomyces albus</i> J1074            | NC_020990.1 |
| <i>Ilumatobacter coccineus</i> YM16-304    | NC_020520.1 |
| <i>Nocardia brasiliensis</i> ATCC 700358   | NC_018681.1 |
| <i>Intrasporangium calvum</i> DSM 43043    | NC_014830.1 |
| <i>Modestobacter marinus</i> BC501         | NC_017955.1 |
| <i>Verrucosipora maris</i> AB-18-032       | NC_015434.1 |
| <i>Rhodococcus pyridinivorans</i> SB3094   | NC_023150.1 |
| <i>Bifidobacterium thermophilum</i> RBL67  | NC_020546.1 |
| <i>Olsenella uli</i> DSM 7084              | NC_014363.1 |
| <i>Gardnerella vaginalis</i> 409-05        | NC_013721.1 |
| <i>Saccharomonospora viridis</i> DSM 43017 | NC_013159.1 |
| <i>Conexibacter woesei</i> DSM 14684       | NC_013739.1 |

**Table S2. Accession numbers for sequence read data used in plasmid assemblies.**

| Accession | Genus                | Species               | Strain                                   |
|-----------|----------------------|-----------------------|------------------------------------------|
| SRR071370 | <i>Mycobacterium</i> | <i>rhodesiae</i>      | 2498                                     |
| ERR248979 | <i>Mycobacterium</i> | <i>intracellulare</i> | MIMRI002-sc-2012-12-17T14:56:10Z-1528566 |
| ERR337762 | <i>Mycobacterium</i> | <i>abscessus</i>      | JRH116-sc-2013-05-15T12:33:12Z-1626758   |
| ERR337800 | <i>Mycobacterium</i> | <i>abscessus</i>      | SMRL154-sc-2013-05-15T12:33:54Z-1626796  |
| ERR337827 | <i>Mycobacterium</i> | <i>abscessus</i>      | SMRL266-sc-2013-05-15T12:35:56Z-1626909  |
| ERR337838 | <i>Mycobacterium</i> | <i>abscessus</i>      | SMRL277-sc-2013-05-15T12:36:08Z-1626920  |
| ERR340495 | <i>Mycobacterium</i> | <i>abscessus</i>      | SMRL429-sc-2013-05-15T12:38:52Z-1627074  |
| ERR340496 | <i>Mycobacterium</i> | <i>abscessus</i>      | SMRL430-sc-2013-05-15T12:38:53Z-1627075  |
| ERR340530 | <i>Mycobacterium</i> | <i>abscessus</i>      | SMRL464-sc-2013-05-15T12:39:30Z-1627109  |
| ERR340542 | <i>Mycobacterium</i> | <i>abscessus</i>      | RBL476-sc-2013-05-15T12:39:44Z-1627122   |
| DRR015955 | <i>Mycobacterium</i> | <i>peregrinum</i>     | DRS014063                                |
| DRR015956 | <i>Mycobacterium</i> | <i>gordonae</i>       | DRS014064                                |
| DRR015957 | <i>Mycobacterium</i> | <i>szulgai</i>        | DRS014065                                |
| DRR015962 | <i>Mycobacterium</i> | <i>flavescens</i>     | DRS014070                                |
| DRR016032 | <i>Mycobacterium</i> | <i>triplex</i>        | DRS014140                                |
| DRR016050 | <i>Mycobacterium</i> | <i>peregrinum</i>     | DRS014158                                |

**Table S3. Accession numbers for finished plasmids.**

| Accession   | Plasmid name                                     |
|-------------|--------------------------------------------------|
| NC_021279.1 | <i>Mycobacterium abscessus</i> bolletii plasmid2 |
| NC_018022.1 | <i>Mycobacterium chubuense</i> NBB4 pMYCCH01     |
| NC_018023.1 | <i>Mycobacterium chubuense</i> NBB4 pMYCCH02     |
| CP000657.1  | <i>Mycobacterium gilvum</i> PYR-GCK pMFLV01      |
| CP006836.1  | <i>Mycobacterium kansasii</i> ATCC12478 pMK12478 |
| HG917973.1  | <i>Mycobacterium marinum</i> E11 pRAW            |
| CP003079.1  | <i>Mycobacterium smegmatis</i> JS623 pMYCSM01    |
| CP003080.1  | <i>Mycobacterium smegmatis</i> JS623 pMYCSM02    |
| CP003081.1  | <i>Mycobacterium smegmatis</i> JS623 pMYCSM03    |
| CP000519.1  | <i>Mycobacterium sp</i> KMS pMKMS01              |
| CP000520.1  | <i>Mycobacterium sp</i> KMS pMKMS02              |
| NC_020275.1 | <i>Mycobacterium yongonense</i> 05-1390 pMyong1  |

**Table S4. Shared plasmid gene content.**

| Plasmid Group (# of plasmids in group) | Shared genes found only in group | Additional shared genes allowing one missing plasmid and duplicate genes |
|----------------------------------------|----------------------------------|--------------------------------------------------------------------------|
| ESX-1P (2)                             | 3 (hypothetical)                 | -                                                                        |
| ESX-2P (8)                             | 0                                | -                                                                        |
| ESX-3P (4)                             | 0                                | 6 ( DNA polymerase III subunit epsilon, 5 hypothetical)                  |
| ESX-5P (7)                             | 0                                | -                                                                        |
| ESX-2/5P (15)                          | 0                                | -                                                                        |

## References:

- Bruen TC, Philippe H, Bryant D. 2006. A Simple and Robust Statistical Test for Detecting the Presence of Recombination. *Genetics* 172:2665–2681.
- Castresana J. 2000. Selection of Conserved Blocks from Multiple Alignments for Their Use in Phylogenetic Analysis. *Mol. Biol. Evol.* 17:540–552.
- Gremme G, Steinbiss S, Kurtz S. 2013. GenomeTools: A Comprehensive Software Library for Efficient Processing of Structured Genome Annotations. *IEEE/ACM Trans. Comput. Biol. Bioinform.* 10:645–656.
- Huson DH, Bryant D. 2006. Application of Phylogenetic Networks in Evolutionary Studies. *Mol. Biol. Evol.* 23:254–267.
- Li L, Stoeckert CJ, Roos DS. 2003. OrthoMCL: Identification of Ortholog Groups for Eukaryotic Genomes. *Genome Res.* 13:2178–2189.
- Sela I, Ashkenazy H, Katoh K, Pupko T. 2015. GUIDANCE2: accurate detection of unreliable alignment regions accounting for the uncertainty of multiple parameters. *Nucleic Acids Res.* 43:W7–W14.
- Smith MD, Wertheim JO, Weaver S, Murrell B, Scheffler K, Pond SLK. 2015. Less Is More: An Adaptive Branch-Site Random Effects Model for Efficient Detection of Episodic Diversifying Selection. *Mol. Biol. Evol.* 32:1342–1353.
- Stamatakis A. 2014. RAxML version 8: a tool for phylogenetic analysis and post-analysis of large phylogenies. *Bioinformatics* 30:1312–1313.
